# Supplementary material for: Vegetable glycerin e-cigarette aerosols cause airway inflammation and ion channel dysfunction
Source: PubMed Central journal article supplement (PMC9549247; doi:10.3389/fphar.2022.1012723), 2022-09-26
Supplement: DataSheet1.pdf [file DataSheet1.pdf]

## Supplementary Figure S1

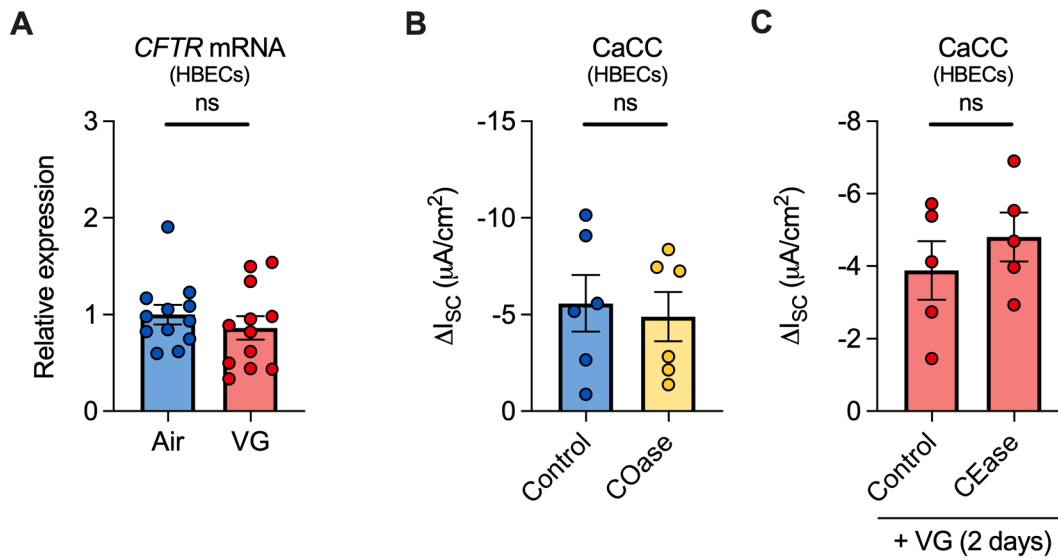

**Supplementary Figure S1.** (A) Exposure of HBECs to VG e-cig aerosols did not significantly affect *CFTR* mRNA expression levels after seven days.  $n = 12$  lungs. (B) CaCC currents remain unchanged in HBECs acutely treated with cholesterol oxidase (COase, 1 U/mL, 30 min) compared to buffer only controls.  $n = 6$  from 4 lungs. (C) Increasing membrane fluidity with cholesterol esterase (CEase, 0.2 U/mL, 30 min) did not significantly change CaCC currents in HBECs exposed to VG e-cig aerosols for two days.  $n = 5$  lungs. **Statistics:** Data are presented as mean  $\pm$  SEM. ns = not significant. Data were analyzed by two-tailed t-test after assessing normality by Shapiro-Wilk.

## Supplementary Table S1

Characteristics of never-smoker donor lungs used in this study.

| <b>Donor lung characteristics</b> | <b>Age (years)</b> |
|-----------------------------------|--------------------|
| <b>Combined</b> (n = 28)          |                    |
| Median                            | 25                 |
| Range                             | 15 – 79            |
| <b>Female</b> (n = 12)            |                    |
| Median                            | 25                 |
| Range                             | 15 – 49            |
| <b>Male</b> (n = 16)              |                    |
| Median                            | 25                 |
| Range                             | 15 – 79            |
